# Supplementary material for: A locally funded Puerto Rican parrot (Amazona vittata) genome sequencing project increases avian data and advances young researcher education
Source: PubMed Central journal article supplement (PMC3626513; doi:10.1186/2047-217x-1-14), 2012-09-28
Supplement: 2047-217X-1-14-S5.pdf [file 2047-217X-1-14-S5.pdf]

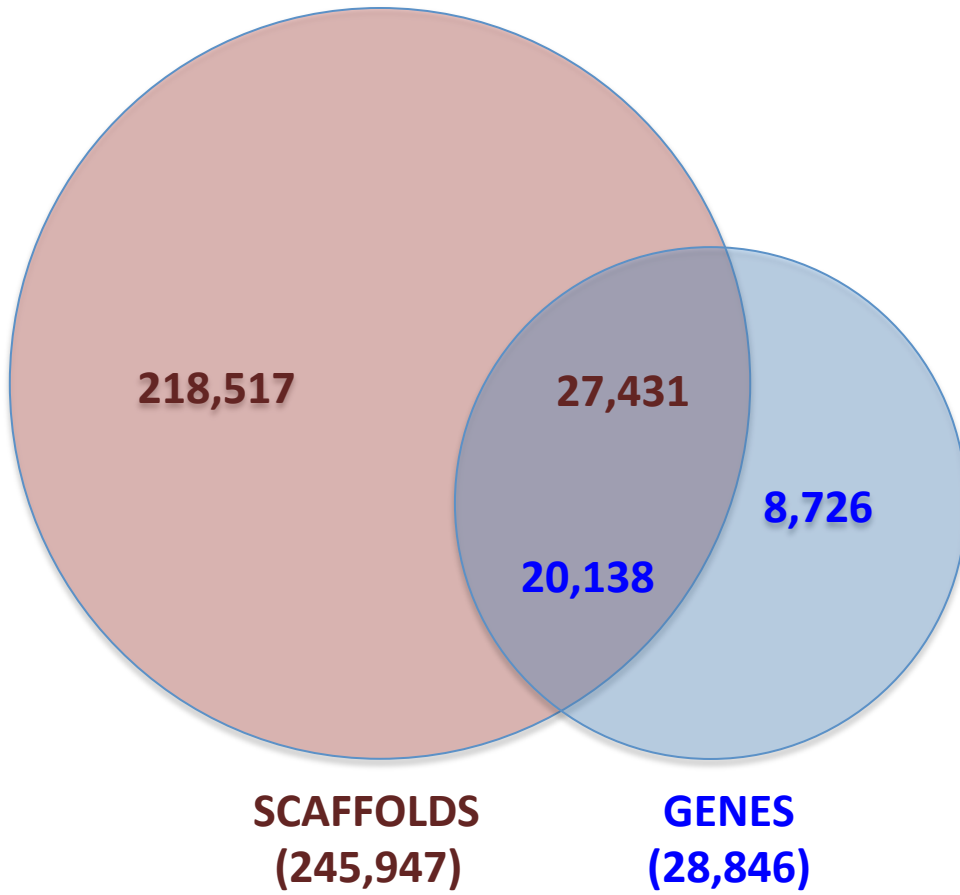

Figure S1

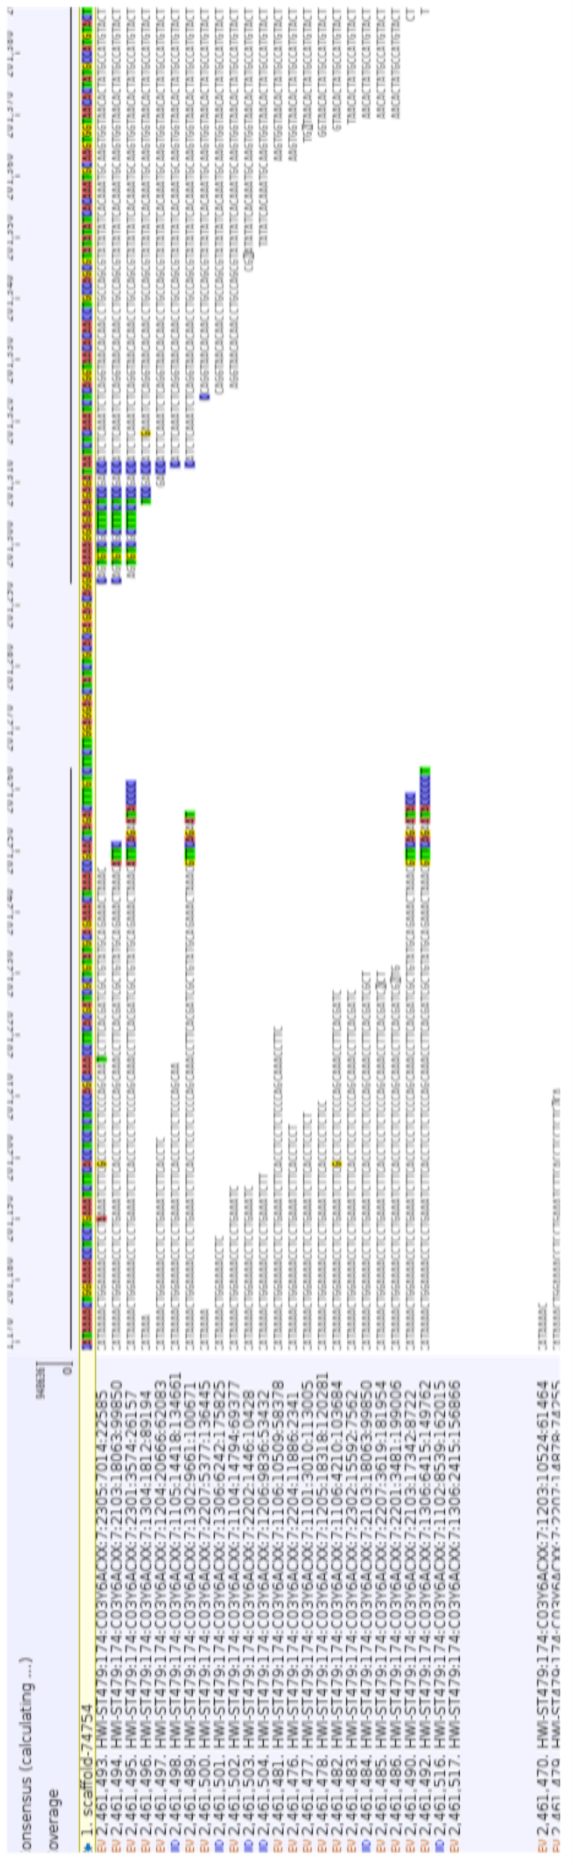

Figure S2

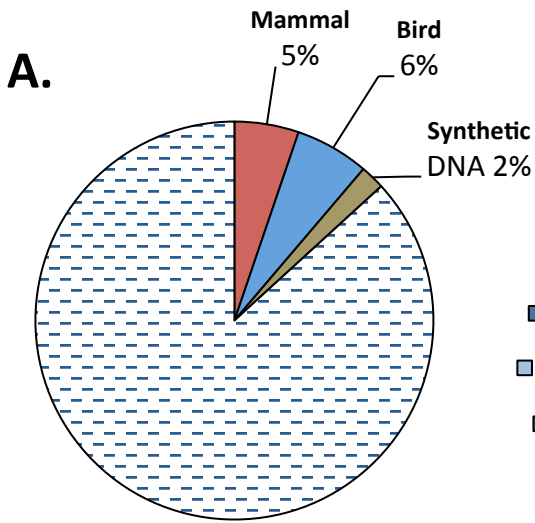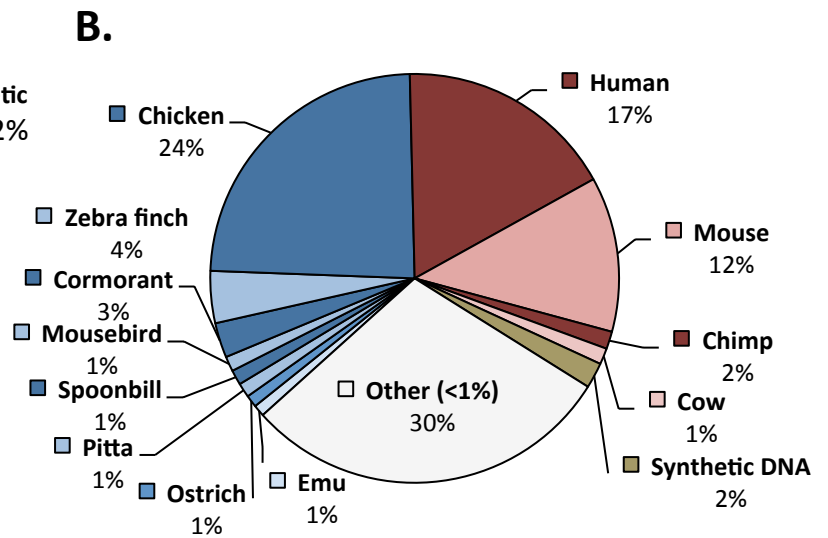

Figure S3

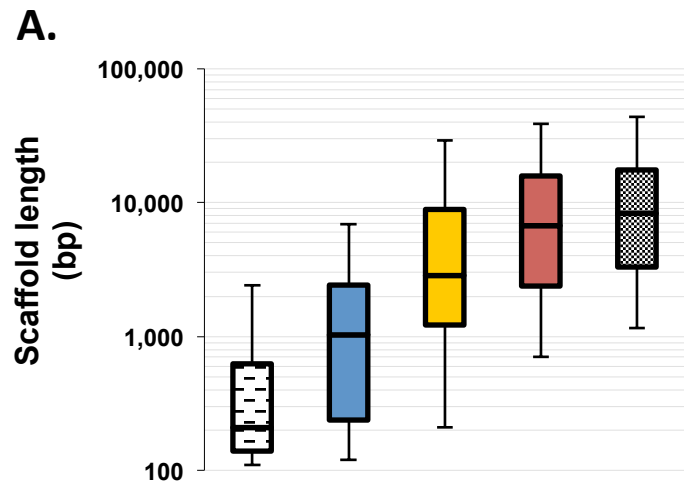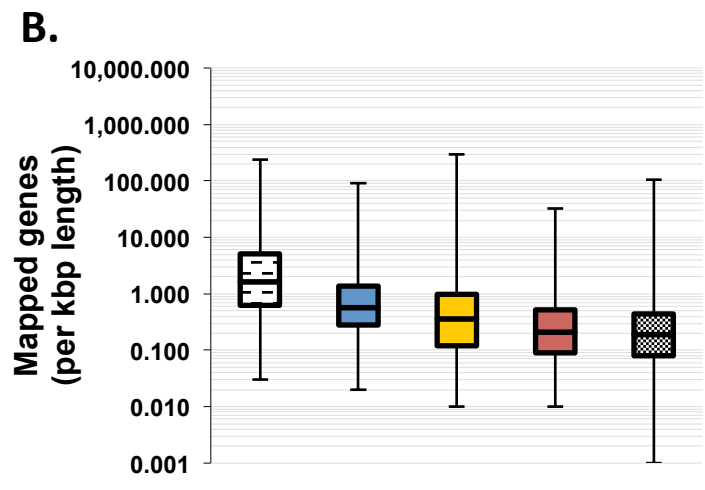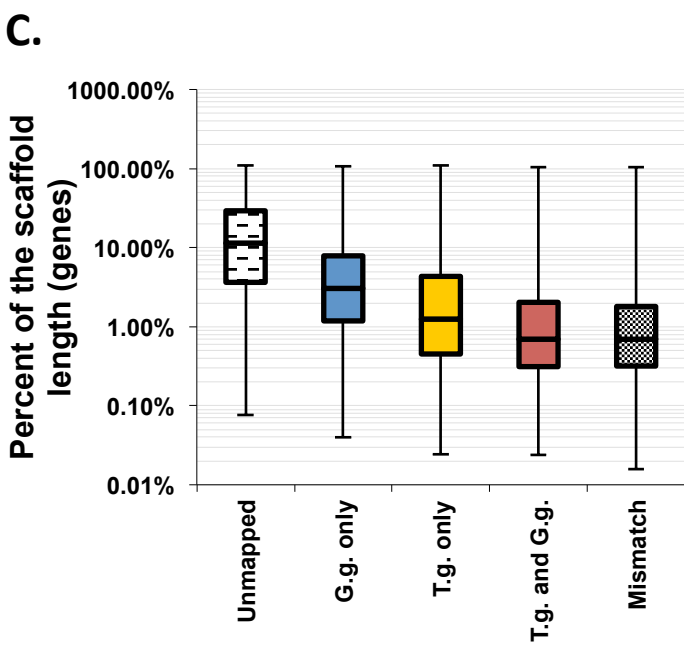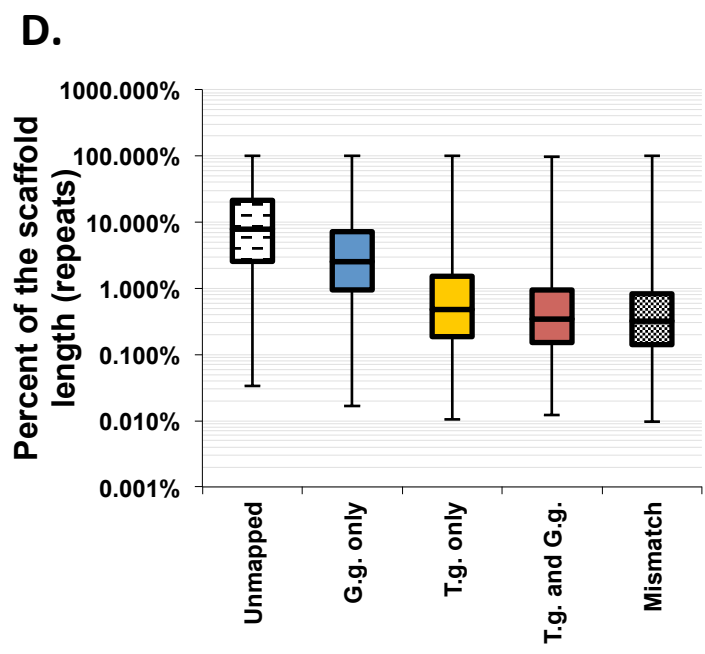

Figure S4

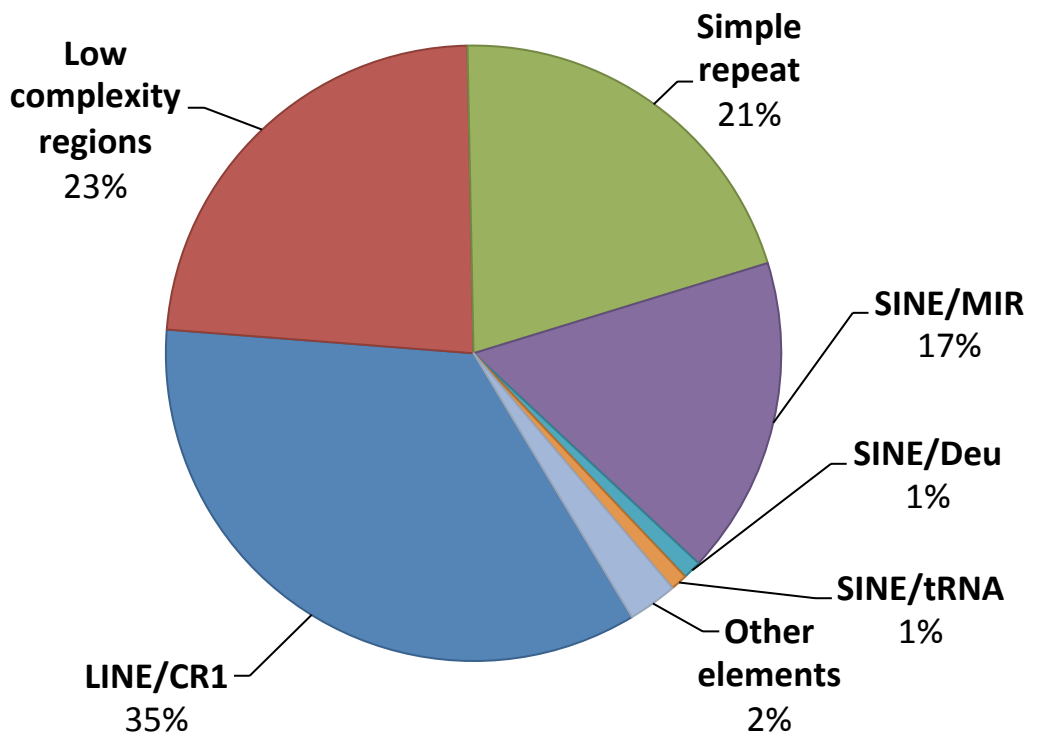

Figure S5

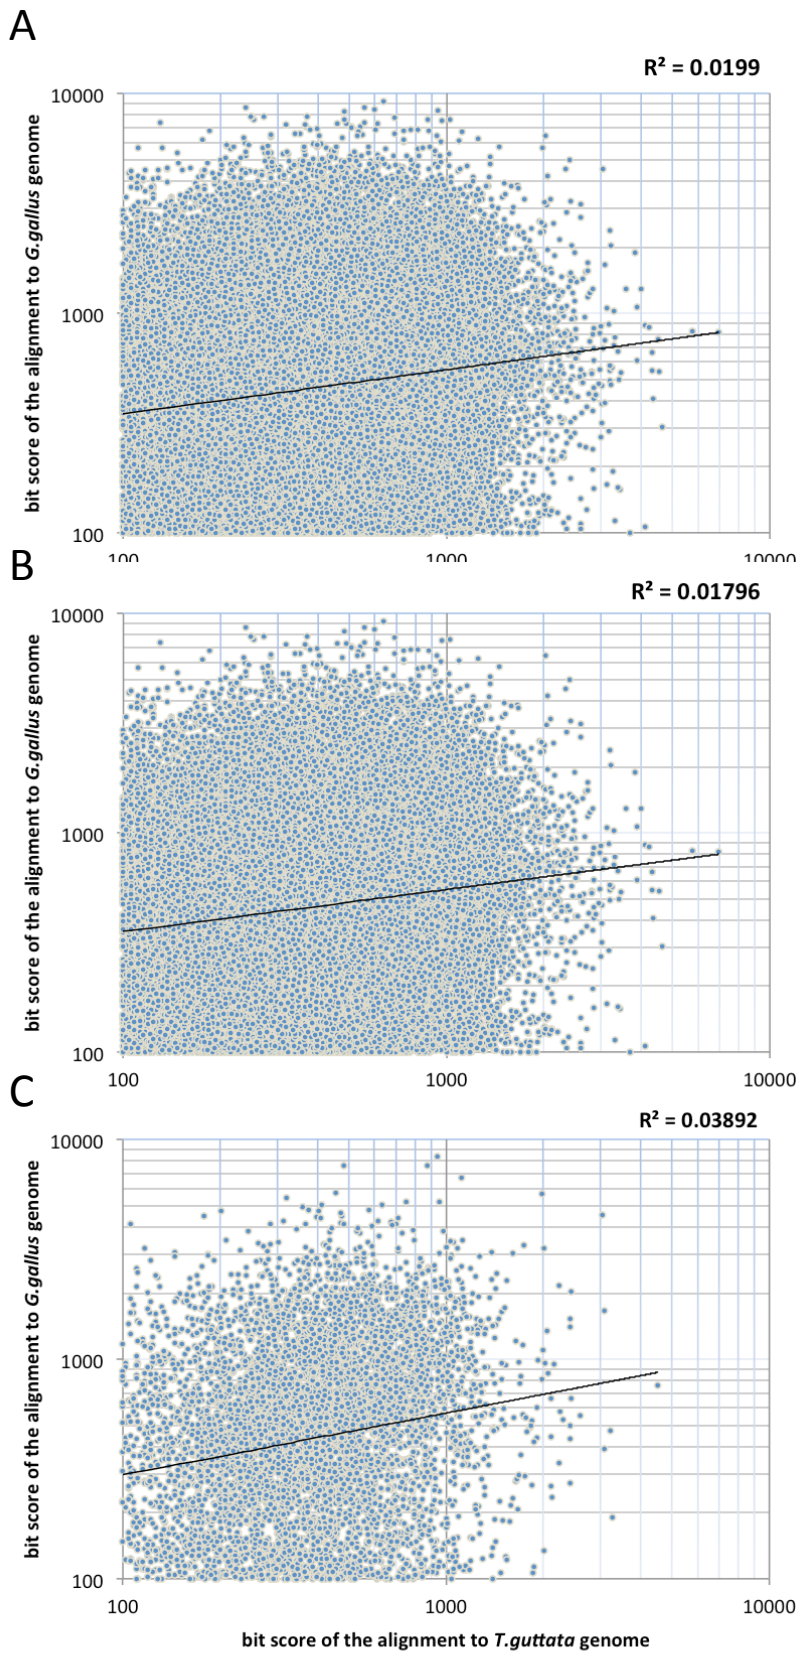

Figure S6

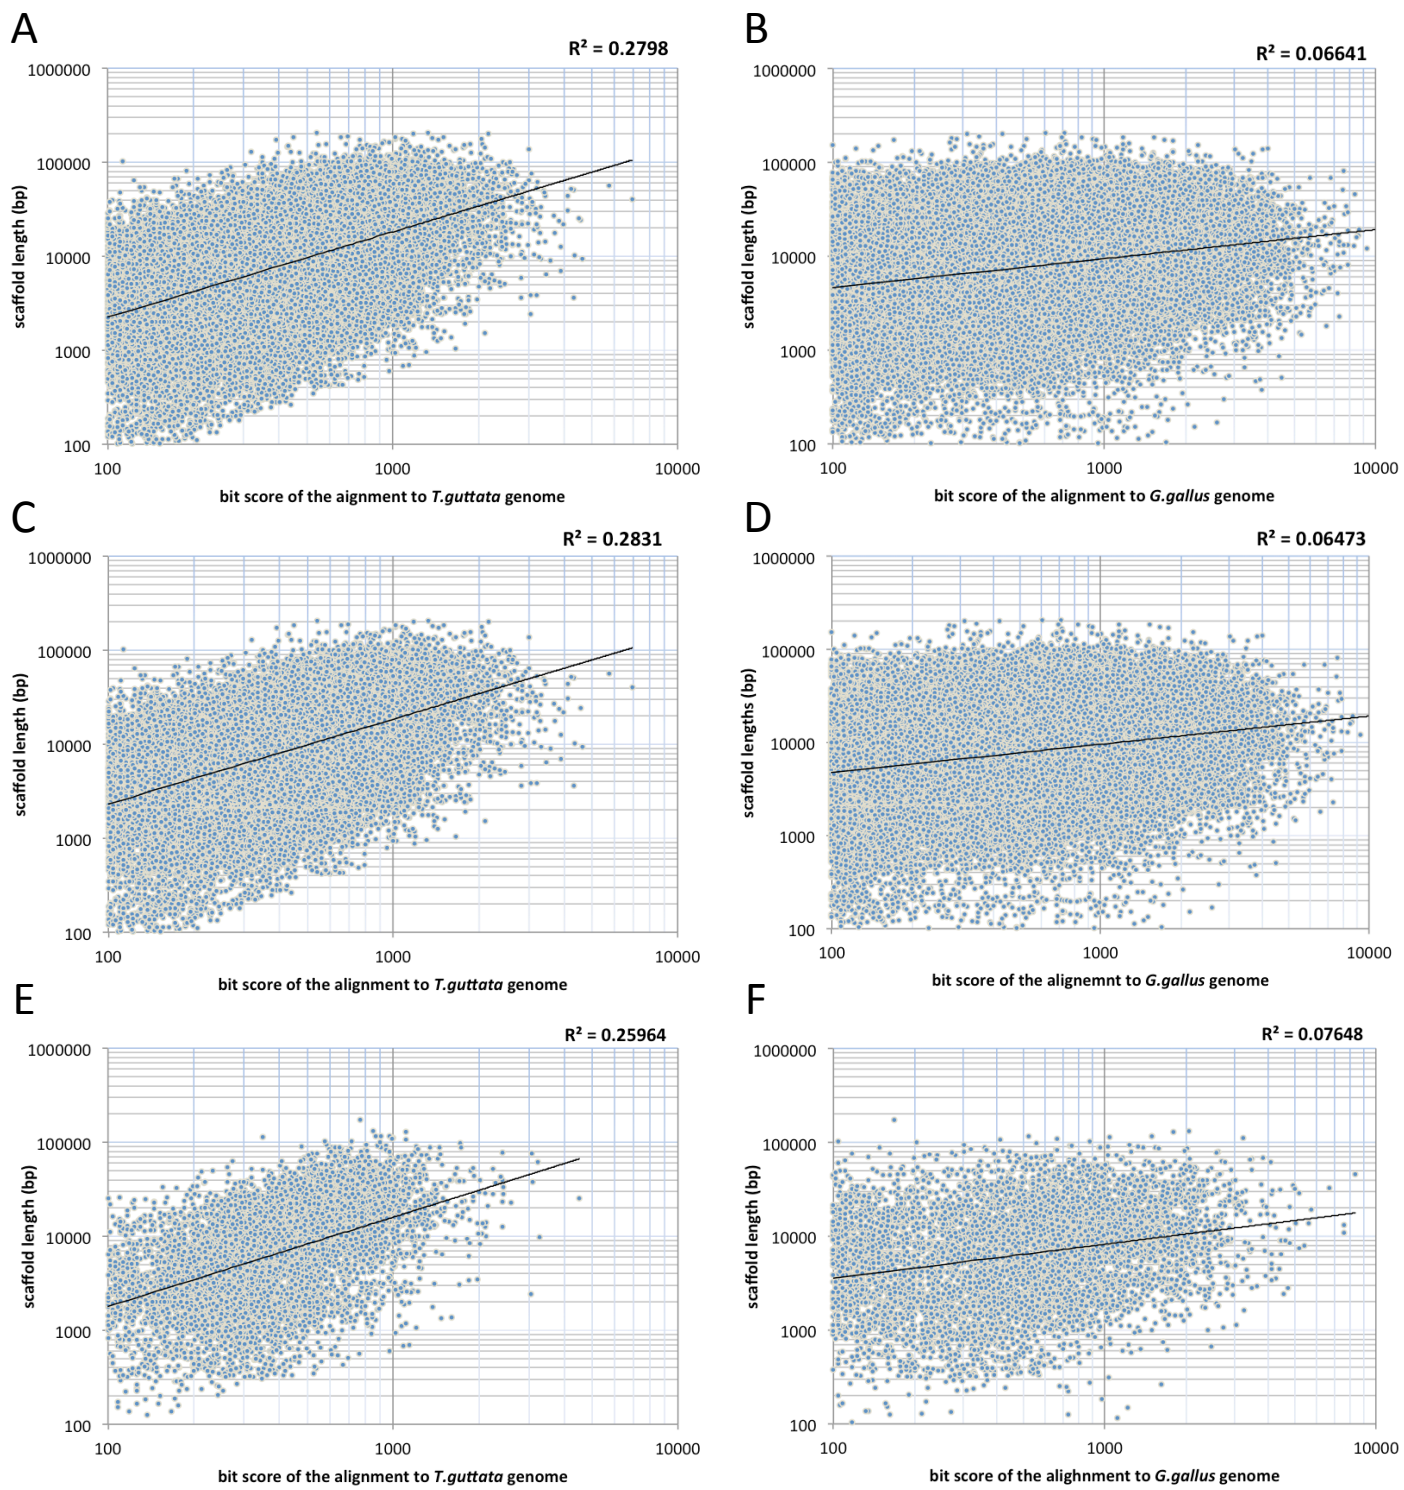

Figure S7

A.

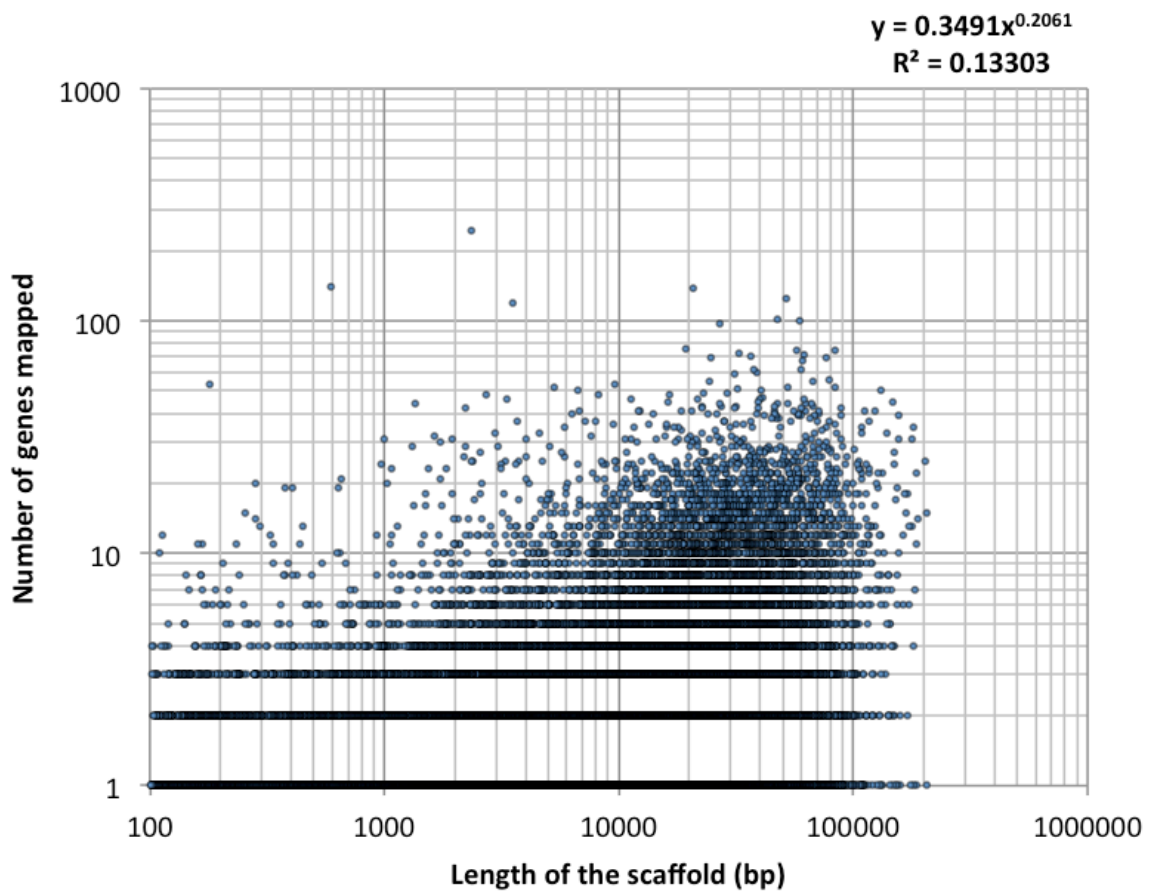

B.

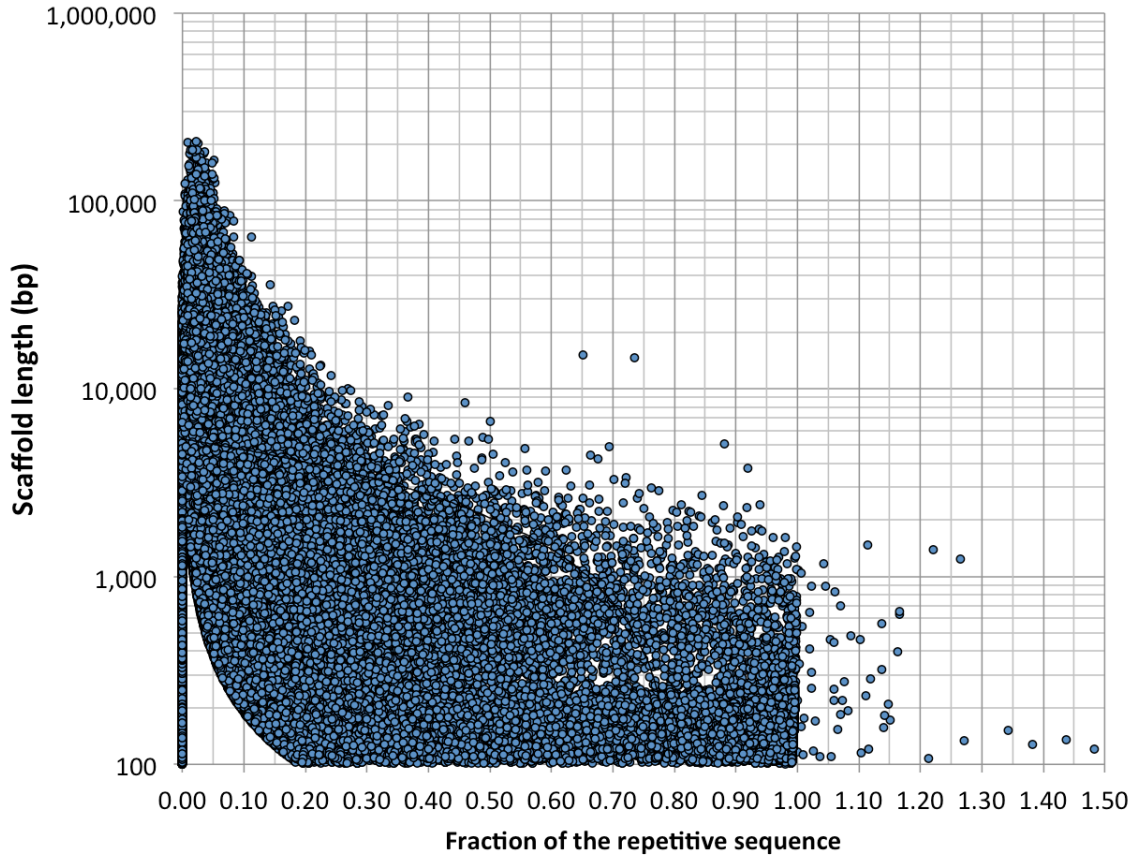

Figure S8
